# Supplementary material
Source: ML conference proceedings conference paper supplement (https://proceedings.neurips.cc/paper_files/paper/2020/hash/97e401a02082021fd24957f852e0e475-Abstract.html)
Supplement: Supplementary file [file 97e401a02082021fd24957f852e0e475-Supplemental.zip]

---

# Supplementary Material: Timeseries Anomaly Detection using Temporal Hierarchical One-Class Network

---

Lifeng Shen<sup>1</sup>, Zhuocong Li<sup>2</sup>, James T. Kwok<sup>1</sup>

<sup>1</sup> Department of Computer Science and Engineering,  
Hong Kong University of Science and Technology, Hong Kong  
{lshenae, jamesk}@cse.ust.hk

<sup>2</sup> Cloud and Smart Industries Group, Tencent, China  
zhuocongli@tencent.com

## A Data sets

*2D-gesture* and *Power demand* [3] can be downloaded from the link <https://www.cs.ucr.edu/~eamonn/discords/>.

*KDD-Cup99* dataset can be obtained from <http://kdd.ics.uci.edu/databases/kddcup99/kddcup99.html>.

*SWaT* is from <https://itrust.sutd.edu.sg/testbeds/secure-water-treatment-swat/>.

*MSL* (Mars Science Laboratory rover) [2] and *SMAP*<sup>A</sup> [2] (Soil Moisture Active Passive satellite) are downloaded from <https://s3-us-west-2.amazonaws.com/telemanom/data.zip>.

## B Experimental Setting

For LOF [1], the number of neighbors is selected from {1, 3, 5, 12}. For one-class SVM [8], the RBF kernel is used. Its inverse length  $\gamma$  is selected from the {0.0001, 0.001, 0.01, 0.1, 0.5}.  $\nu$  is another hyperparameter in the OC-SVM, which is selected from {0.1, 0.2, 0.6}. For the isolation forest [6], the number of tree is selected from {25, 100}. For DAGMM [10], we use its default hyperparameters. For GAN-based baselines (AnoGAN [7], MAD-GAN [5], BeatGAN [9]), we use a sliding window to extract recent history information for prediction. The window length is 80 on *2D-gesture* and *power-demand*, and 100 on the other data sets. For samples tested at multiple windows, we use its average anomaly score over the windows as the final evaluation score.

LOF, OC-SVM and isolation forest are implemented with the Scikit-learn library. The other baselines are downloaded from the following:

- DAGMM: <https://github.com/danieltan07/dagmm>
- EncDec-AD: <https://github.com/KDD-OpenSource/DeepADoTS>
- LSTM-VAE: <https://github.com/SchindlerLiang/VAE-for-Anomaly-Detection>
- AnoGAN: <https://github.com/LeeDoYup/AnoGAN-tf>
- BeatGAN: <https://github.com/Vniex/BeatGAN>
- MadGAN: <https://github.com/LiDan456/MAD-GANs>
- OmniAnomaly: <https://github.com/NetManAI0ps/OmniAnomaly>
- MSCRED: <https://github.com/wxdang/MSCREd>

- CVDD: <https://github.com/lukasruff/CVDD-PyTorch>
- Deep SVDD: <https://github.com/lukasruff/Deep-SVDD>

In the proposed model, we use a three-layer dilated RNN with  $\ell_2$ -regularization (with regularization parameter  $10^{-6}$ ). The number of hidden units is chosen from  $\{32, 64, 84\}$ . For the number of centers in each layer  $\{K^l\}$ , empirically we found that simply using a constant or decreasing sequence ( $K^1 \geq \dots \geq K^L$ ) achieve good performance. Specifically, we select  $\{K^l\}$  from  $\{\{6,6,6\}, \{12, 6, 1\}, \{12, 6, 4\}, \{18, 6, 1\}, \{18, 12, 4\}, \{18, 12, 6\}, \{32, 12, 6\}\}$ , and  $\{s^{(1)}, \dots, s^{(L)}\}$  from  $\{\{1,2,4\}, \{1,4,8\}, \{1,4,12\}, \{1,4,16\}\}$ . Centers in each layer are initialized by  $k$ -means clustering on the hidden states.  $\lambda_{\text{orth}}$  and  $\lambda_{\text{TSS}}$  are selected from  $\{0.01, 0.1, 1, 10, 100\}$ . We use the Adam optimizer [4]. The initial learning rate is 0.01 for *2D-gesture*, *Power demand* and *KDD-Cup99*; and 0.001 for the other datasets. This is decayed by a factor of 0.65 after every 20 epochs. The initial value of the  $1/\tau$  in Eq.(5) is selected from  $\{0.01, 1, 10, 20\}$ , and is increased by a factor of 1.5 every 5 epochs, until a maximum of 300 is reached. The batch-size is selected from  $\{32, 64, 128\}$ . The experiments are run on the PyTorch platform using a GeForce GTX1080-Ti 11G GPU.

## References

- [1] Markus M. Breunig, Hans-Peter Kriegel, Raymond T. Ng, and Jörg Sander. Lof: Identifying density-based local outliers. In *International Conference on Management of Data*, pages 93–104, 2000.
- [2] Kyle Hundman, Valentino Constantinou, Christopher Laporte, Ian Colwell, and Tom Soderstrom. Detecting spacecraft anomalies using lstms and nonparametric dynamic thresholding. In *International Conference on Knowledge Discovery & Data Mining*, pages 387–395, 2018.
- [3] E. Keogh, J. Lin, and A. Fu. HOT SAX: efficiently finding the most unusual time series subsequence. In *International Conference on Data Mining*, 2005.
- [4] Diederik P Kingma and Jimmy Ba. Adam: A method for stochastic optimization. Preprint arXiv:1412.6980, 2014.
- [5] Dan Li, Dacheng Chen, Lei Shi, Baihong Jin, Jonathan Goh, and See-Kiong Ng. MAD-GAN: Multivariate anomaly detection for time series data with generative adversarial networks. Preprint arXiv:1901.04997, 2019.
- [6] Fei Tony Liu, Kai Ming Ting, and Zhi-Hua Zhou. Isolation forest. In *International Conference on Data Mining*, pages 413–422, 2008.
- [7] Thomas Schlegl, Philipp Seeböck, Sebastian M Waldstein, Ursula Schmidt-Erfurth, and Georg Langs. Unsupervised anomaly detection with generative adversarial networks to guide marker discovery. In *International Conference on Information Processing in Medical Imaging*, pages 146–157. Springer, 2017.
- [8] David MJ Tax and Robert PW Duin. Support vector data description. *Machine learning*, 54(1):45–66, 2004.
- [9] Bin Zhou, Shenghua Liu, Bryan Hooi, Xueqi Cheng, and Jing Ye. Beatgan: Anomalous rhythm detection using adversarially generated time series. In *International Joint Conference on Artificial Intelligence*, pages 4433–4439, 2019.
- [10] Bo Zong, Qi Song, Martin Renqiang Min, Wei Cheng, Cristian Lumezanu, Daeki Cho, and Haifeng Chen. Deep autoencoding Gaussian mixture model for unsupervised anomaly detection. In *International Conference on Learning Representations*, 2018.
